# Supplementary material for: Efficient panchromatic inorganic–organic heterojunction solar cells with consecutive charge transport tunnels in hole transport material
Source: Royal Society of Chemistry journal article supplement (doi:10.1039/c3cc42297f), 2013-01-01
Supplement: c3cc42297f.pdf [file c3cc42297f.pdf]

## Supporting Information

### **Efficient panchromatic inorganic-organic heterojunction solar cells with consecutive charge transport tunnels in hole transport material**

Haiwei Chen, Xu Pan\*, Weiqing Liu, Molang Cai, Dongxing Kou, Zhipeng Huo, Xiaqin Fang, and Songyuan Dai\*

Key Laboratory of Novel Thin Film Solar Cells, Institute of Plasma Physics, Chinese Academy of Sciences, P. O. Box 1126, Hefei, Anhui 230031, PR China

\* To whom correspondence should be addressed: sydai@ipp.ac.cn ; mars\_dark@hotmail.com

The TiO<sub>2</sub> (anatase) colloidal solution was prepared according to a previous report.<sup>1</sup> Subsequently, it was diluted in ethanol at 1:2.5 by weight and stirred overnight to form a paste. Patterned conducting fluorine-doped SnO<sub>2</sub>(FTO) glass (15 Ω/□) was etched with Zn powder and 2 M aqueous HCl solution. Then it was cleaned with successive sonication in milliQ water, isopropanol and acetone for 5 min and dried with clean dry air. To make a dense TiO<sub>2</sub> under layer, the cleaned FTO glass was immersed in 0.15 M aqueous TiCl<sub>4</sub> solution at 60 °C for 30 min. After rinsing with water, it was dried with clean dry air and sintered in air at 510 °C for 30 min. The TiO<sub>2</sub> paste was deposited on FTO glass by using a spin-coating technique at the speed of 2000 rpm for 30 s and annealed in air at 510 °C for 30 min. The TiO<sub>2</sub> film was ~600 nm in thickness measured by a surface profilometer (XP-2, AMBIOS Technology Inc., USA). CH<sub>3</sub>NH<sub>3</sub>PbI<sub>3</sub> precursor solution was prepared according to a previous report.<sup>2</sup> The CH<sub>3</sub>NH<sub>3</sub>PbI<sub>3</sub> precursor solution was spin-coated on TiO<sub>2</sub> films at speed of 2000 rpm for 30 s and dried at 100 °C for 20 min in glovebox. The hole transport material (HTM) was a chlorobenzene solution containing 10 mg/mL P3HT, 0.2 M 4-tert-butylpyridine (TBP), 0.06 M bis (trifluoromethane) sulfonimide lithium salt. A second P3HT solution with MWNTs accounting for 2 wt% of P3HT was also prepared. Thereafter the different HTM solutions were coated on the CH<sub>3</sub>NH<sub>3</sub>PbI<sub>3</sub> deposited TiO<sub>2</sub> films using spin-coating technique at 2000 rpm for 50 s and dried at 120 °C for 30 min in glovebox. Then a gold electrode was deposited on top by magnetic sputtering. The active area of the hybrid solar cells was 0.09 cm<sup>2</sup>. For DC conductivity measurement, P3HT or P3HT-MWNTs solution was cast on clean glass and dried in a glovebox. The Van der Pauw four-probe method, using Keithley 2402 source meter, was employed for conductivity measurement of the P3HT and P3HT-MWNTs samples.

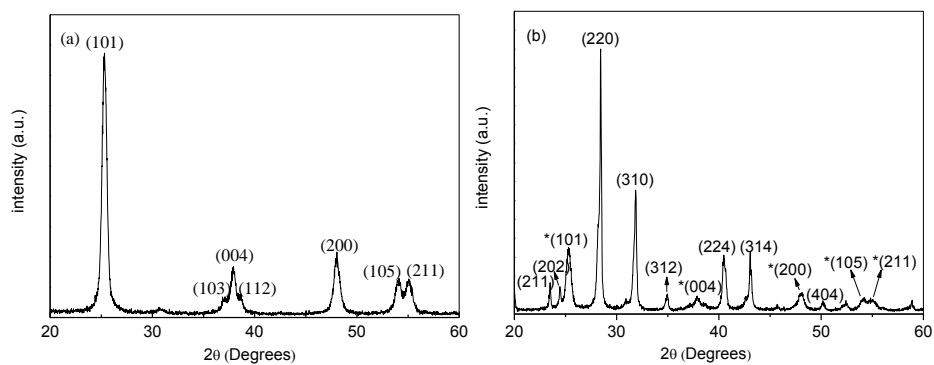

Fig. S1 X-ray Diffraction (XRD) pattern of (a) TiO<sub>2</sub> and (b) CH<sub>3</sub>NH<sub>3</sub>PbI<sub>3</sub> deposited on TiO<sub>2</sub>.

In Fig. S1b, the peaks with “\*” were attributed to TiO<sub>2</sub> and the peaks without one were attributed to CH<sub>3</sub>NH<sub>3</sub>PbI<sub>3</sub>.

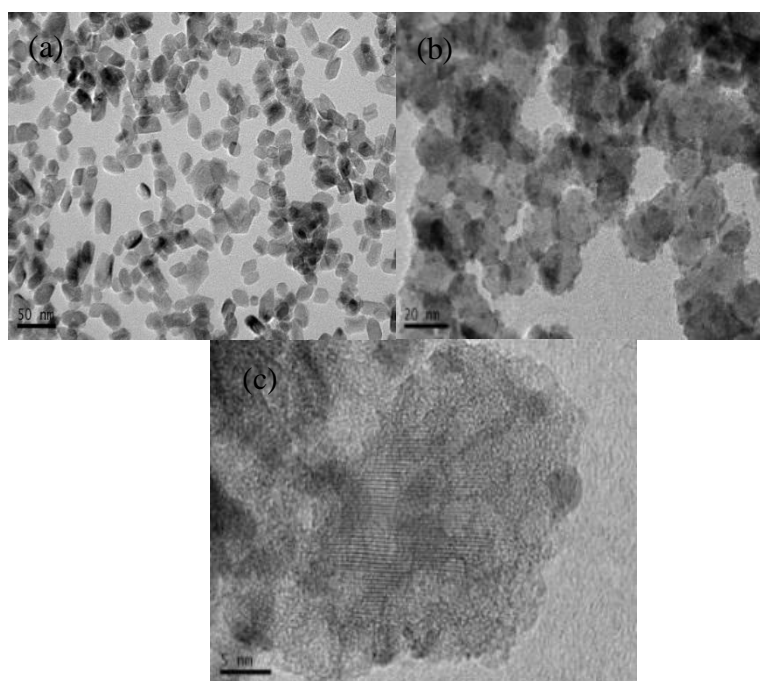

Fig. S2 TEM image of (a) TiO<sub>2</sub> nanoparticles, (b) CH<sub>3</sub>NH<sub>3</sub>PbI<sub>3</sub> deposited TiO<sub>2</sub> nanoparticles and (c) magnified picture of CH<sub>3</sub>NH<sub>3</sub>PbI<sub>3</sub> deposited TiO<sub>2</sub>.

1. L. H. Hu, S. Y. Dai, J. Weng, S. F. Xiao, Y. F. Sui, Y. Huang, S. H. Chen, F. T. Kong, X. Pan, L. Y. Liang and K. J. Wang, *J Phys Chem B*, 2007, **111**, 358-362.
2. J. H. Im, C. R. Lee, J. W. Lee, S. W. Park and N. G. Park, *Nanoscale*, 2011, **3**, 4088-4093.
